# Supplementary material for: Mapping the immunogenic landscape of near-native HIV-1 envelope trimers in non-human primates
Source: PubMed Central journal article supplement (PMC7485981; doi:10.1371/journal.ppat.1008753), 2020-08-31
Supplement: ppat.1008753.s001.pdf [file ppat.1008753.s001.pdf]

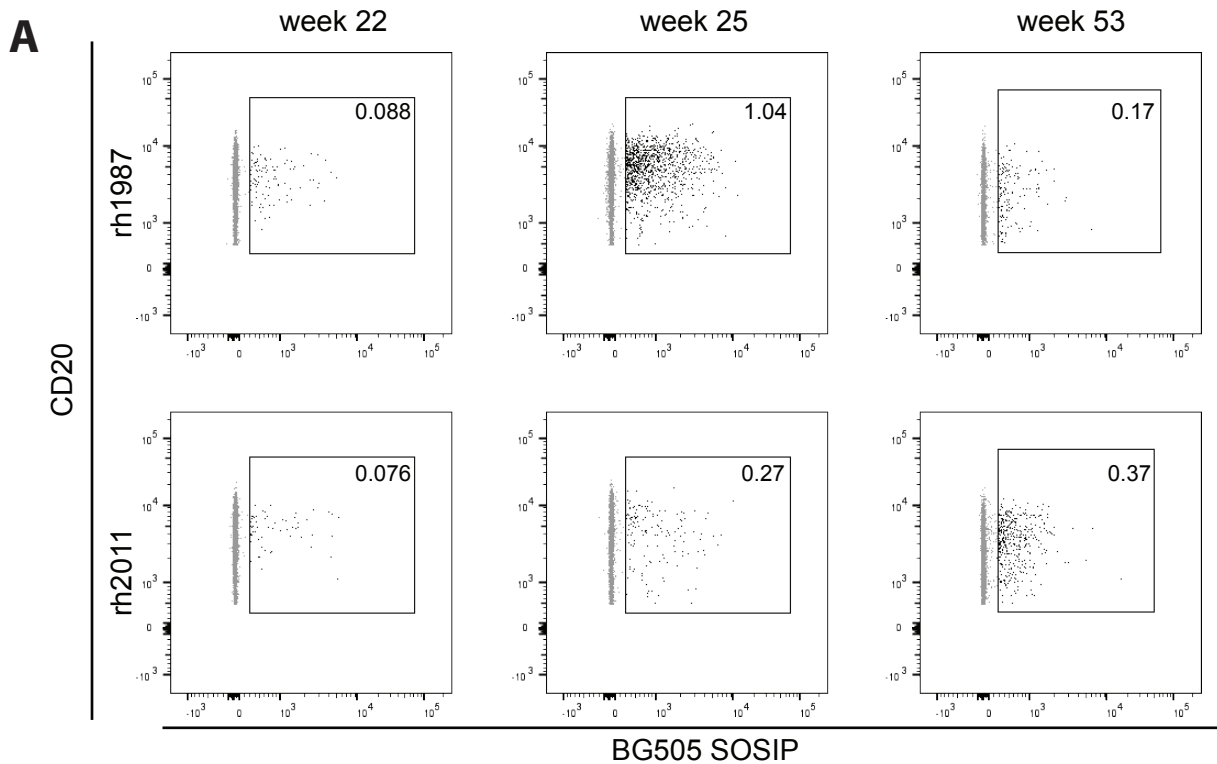

**B**

| mAb    | SOSIP ELISA | gp120 ELISA |
|--------|-------------|-------------|
| RM19A  | ++          | +++         |
| RM19A1 | +++         | +++         |
| RM19A2 | +++         | +++         |
| RM19A3 | ++          | +           |
| RM19B  | ++          | -           |
| RM19B1 | +           | -           |
| RM19C  | +           | -           |
| RM19C2 | ++          | -           |
| RM19C3 | ++          | -           |
| RM19C4 | ++          | +           |
| RM19D  | +++         | +++         |
| RM19E  | +           | -           |
| RM19F  | +           | -           |
| RM19F1 | ++          | -           |
| RM19G  | ++          | -           |
| RM19J  | ++          | -           |
| RM19K  | +++         | ++          |
| RM19L  | ++          | -           |
| RM19M  | ++          | -           |
| RM19N  | +           | +           |
| RM19O  | +++         | +++         |
| RM19P  | +++         | +++         |
| RM19R  | ++          | -           |
| RM19S  | ++          | -           |
| RM19T  | ++          | ++          |

**C**

| mAb    | SOSIP ELISA | gp120 ELISA |
|--------|-------------|-------------|
| RM20A  | ++          | -           |
| RM20A1 | ++          | -           |
| RM20A2 | ++          | -           |
| RM20A3 | ++          | -           |
| RM20B  | +           | -           |
| RM20B1 | +           | -           |
| RM20C  | +           | -           |
| RM20D  | ++          | +++         |
| RM20E  | +++         | +           |
| RM20E1 | ++          | +           |
| RM20E2 | ++          | +           |
| RM20E3 | +           | +           |
| RM20F  | ++          | +           |
| RM20G  | ++          | -           |
| RM20H  | ++          | ++          |
| RM20I  | ++          | ++          |
| RM20J  | +++         | +++         |

| EC50 (ug/mL) |     |
|--------------|-----|
| <0.1         | +++ |
| 0.1-1        | ++  |
| 1-10         | +   |
| >10          | -   |

**S1 Fig. MAb isolation and characterization from BG505 SOSIP.664 trimer-immunized macaques.** (A) FACS gating strategy for isolation of BG505 SOSIP specific memory B-cells. (B) BG505 SOSIP.664 trimer and BG505 gp120 ELISA binding data for mAbs isolated from RM rh1987 and (C) from RM rh2011.
