# Supplementary material for: Mapping the immunogenic landscape of near-native HIV-1 envelope trimers in non-human primates
Source: PubMed Central journal article supplement (PMC7485981; doi:10.1371/journal.ppat.1008753), 2020-08-31
Supplement: ppat.1008753.s002.pdf [file ppat.1008753.s002.pdf]

| A | mAb    | 2D class averages                                                                   | 3D reconstructions                                                                  | Epitope | EMDB#     |
|---|--------|-------------------------------------------------------------------------------------|-------------------------------------------------------------------------------------|---------|-----------|
|   | RM19A1 |    |    | 289 GH  | EMD-21062 |
|   | RM19B  |    |    | base    | EMD-21075 |
|   | RM19B1 |    |    | base    | EMD-21077 |
|   | RM19C  |    |    | base    | EMD-21078 |
|   | RM19C2 |    |    | base    | EMD-21079 |
|   | RM19C3 |    |    | base    | EMD-21082 |
|   | RM19E  |    |    | base    | EMD-21080 |
|   | RM19F  |    |    | base    | EMD-21056 |
|   | RM19G  |   |    | base    | EMD-21081 |
|   | RM19J  |  |  | 289 GH  | EMD-21055 |
|   | RM19K  |  |  | base    | EMD-21076 |
|   | RM19L  |  |  | base    | EMD-21066 |
|   | RM19M  |  |  | base    | EMD-21061 |
|   | RM19N  |  |  | base    | EMD-21053 |
|   | RM19O  |  |  | base    | EMD-21065 |
|   | RM19P  |  |  | 289 GH  | EMD-21064 |
|   | RM19R  |  |  | base    | EMD-21058 |
|   | RM19S  |  |  | N611/FP | EMD-21059 |
|   | RM19T  |  |  | N289 GH | EMD-21057 |

**B**

| mAb    | 2D class averages                                                                   | 3D reconstructions                                                                  | Epitope              | EMDB#     |
|--------|-------------------------------------------------------------------------------------|-------------------------------------------------------------------------------------|----------------------|-----------|
| RM20A2 |    |    | base                 | EMD-21083 |
| RM20A3 |    |    | base                 | EMD-21084 |
| RM20B  |    |    | base                 | EMD-21085 |
| RM20B1 |    |    | base                 | EMD-21086 |
| RM20C  |    |    | base                 | EMD-21087 |
| RM20E  |    |    | N611/FP              | EMD-21093 |
| RM20E1 |  |  | N611/FP              | EMD-21090 |
| RM20F  |  |  | gp120/gp41 interface | EMD-21091 |
| RM20G  |  |  | base                 | EMD-21088 |
| RM20H  |  |  | gp120/gp41 interface | EMD-21092 |
| RM20J  |  |  | 289 GH               | EMD-21089 |

**S2 Fig. Negative stain electron microscopy epitope mapping of Fabs from rh1987 and rh2011.**

Representative 2D class averages, 3D reconstructions, and EMDB accession numbers for (A) rh1987 and (B) rh2011.
