# Supplementary material for: Mapping the immunogenic landscape of near-native HIV-1 envelope trimers in non-human primates
Source: PubMed Central journal article supplement (PMC7485981; doi:10.1371/journal.ppat.1008753), 2020-08-31
Supplement: ppat.1008753.s003.pdf [file ppat.1008753.s003.pdf]

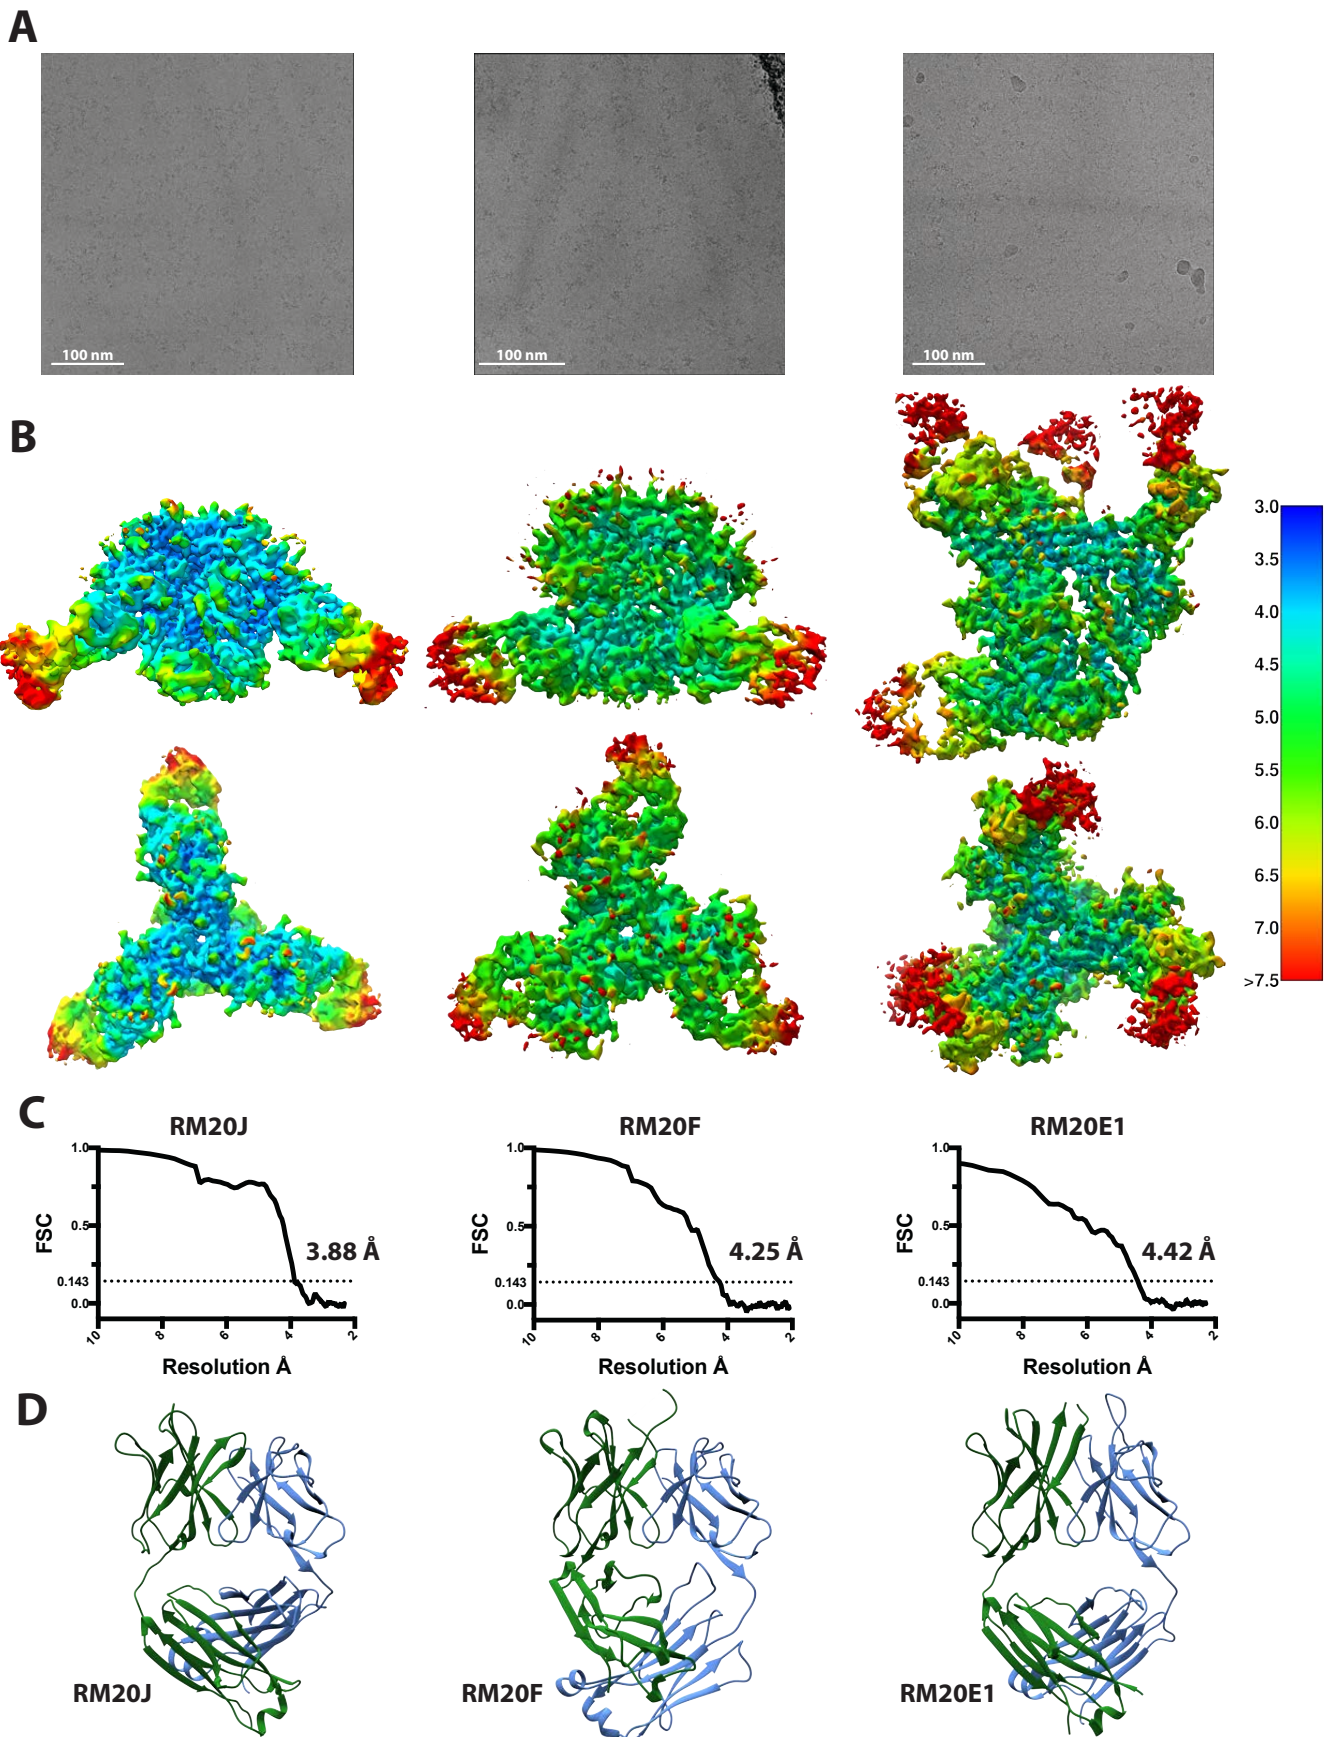

**S3 Fig. Cryo-EM structures of BG505 SOSIP trimers with mAbs and crystal structures of mAbs.** (A) Representative micrographs for cryoEM datasets. (B) Local resolution maps for each complex generated in cryoSPARC v2 (Punjani et al., 2017). (C) Gold-standard Fourier shell correlation (FSC) curves for each complex showing global resolution calculated at FSC = 0.143. (D) Crystal structures of unliganded Fabs RM20J, RM20F, and RM20E1. Heavy chains are shown in green and light chains shown in light blue.
