# Supplementary material for: Mapping the immunogenic landscape of near-native HIV-1 envelope trimers in non-human primates
Source: PubMed Central journal article supplement (PMC7485981; doi:10.1371/journal.ppat.1008753), 2020-08-31
Supplement: ppat.1008753.s004.pdf [file ppat.1008753.s004.pdf]

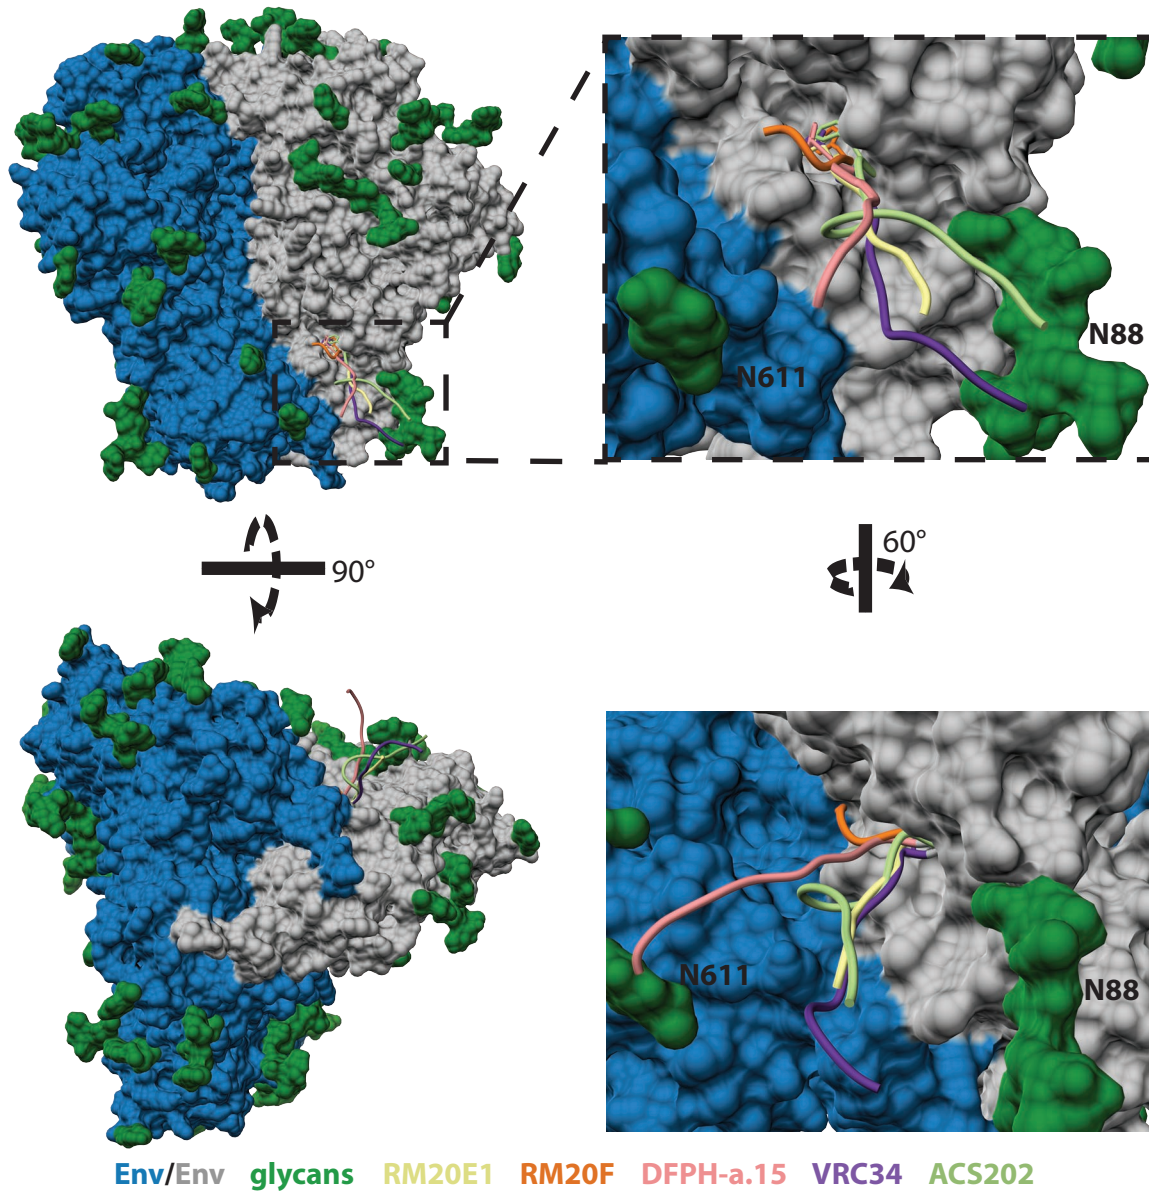

**S4 Fig. Antibody bound FP conformations.** The HIV Env trimer is shown as a surface representation with one protomer colored in grey, the other two protomers colored in blue, and the N-linked glycans colored in green. The FP (residues 512-522) from the antibody bound structures of RM20E1, RM20F, DFPH-a.15 (PDB: 6N1W), VRC34 (PDB: 5I8H), and ACS202 (PDB: 6NC2) are shown as colored backbone ribbon diagrams.
