# Supplementary material for: Mapping the immunogenic landscape of near-native HIV-1 envelope trimers in non-human primates
Source: PubMed Central journal article supplement (PMC7485981; doi:10.1371/journal.ppat.1008753), 2020-08-31
Supplement: ppat.1008753.s006.pdf [file ppat.1008753.s006.pdf]

## S2 Table. Mab Characteristics

| mAb    | Timepoint | Animal ID | LC type | VH gene                 | DH gene         | JH gene        | HCDR3 aa                | HCDR3 length | HC %SHM | VL gene               | JL gene        | LCDR3 aa    | LCDR3 length | LC %SHM | Epitope targeted     |
|--------|-----------|-----------|---------|-------------------------|-----------------|----------------|-------------------------|--------------|---------|-----------------------|----------------|-------------|--------------|---------|----------------------|
| RM19A  | week 22   | rh1987    | Kappa   | IGHV3-AFE*01 S3736      | IGHD4-22*01     | IGHJ4*01       | ARGGVYSNYEYF            | 11           | 4.6%    | IGKV1-AAL*01          | LJI.Rh IGKJ1.1 | QQYNSYPT    | 9            | 5.6%    | 289 hole epitope*    |
| RM19A1 | week 25   | rh1987    | Kappa   | IGHV3-AFE*01 S3736      | IGHD4-22*01     | IGHJ4*01       | AKGGVYSNYDF             | 11           | 6.3%    | IGKV1-AAL*01          | LJI.Rh IGKJ1.1 | QQYNSDPT    | 9            | 4.7%    | 289 hole epitope     |
| RM19A2 | week 25   | rh1987    | Kappa   | IGHV3-AFE*01 S3736      | IGHD4-22*01     | IGHJ4*01       | AKGGVYSNYDF             | 11           | 7.2%    | IGKV1-AAL*01          | LJI.Rh IGKJ1.1 | QQYNSDPT    | 9            | 5.9%    | 289 hole epitope*    |
| RM19A3 | week 25   | rh1987    | Kappa   | IGHV3-AFE*01 S3736      | IGHD4-22*01     | IGHJ4*01       | ARGGVYSNYDY             | 11           | 3.4%    | IGKV1-AAL*01          | LJI.Rh IGKJ1.1 | QQHNRDPT    | 9            | 4.3%    | 289 hole epitope*    |
| RM19D  | week 22   | rh1987    | Kappa   | LJI.Rh IGHV3.50         | IGHD3-26*01     | IGHJ6*01       | VRDYGGGLD               | 10           | 3.3%    | IGKV2-AEB*01          | LJI.Rh IGKJ2.2 | TQGLEFPYS   | 9            | 2.6%    | n.d.                 |
| RM19J  | week 25   | rh1987    | Kappa   | IGHV4-AGU*01 S2780      | IGHD4-I1        | IGHJ4*01       | ARFNSGDYDF              | 10           | 8.6%    | IGKV1-AAL*01          | LJI.Rh IGKJ3.3 | INILTLTL    | 9            | 8.7%    | 289 hole epitope     |
| RM19N  | week 25   | rh1987    | Kappa   | IGHV4-S40 S2532         | IGHD2-8*01      | IGHJ4*01       | ARERVVSATSDVYYFDY       | 17           | 2.1%    | IGKV1-S57             | LJI.Rh IGKJ2.2 | QHSYDTPYS   | 9            | 4.4%    | base                 |
| RM19P  | week 25   | rh1987    | Kappa   | IGHV4-AGU*01 S2780      | IGHD6-29*01     | IGHJ4*01       | SSSGWSV                 | 7            | 4.6%    | IGKV1-AA*01           | LJI.Rh IGKJ2.2 | QQYNSYPT    | 9            | 3.7%    | 289 hole epitope     |
| RM19R  | week 25   | rh1987    | Kappa   | IGHV4-S40 S2532         | IGHD3-3*01      | IGHJ5-1*01     | AFFWSTYYKRFDV           | 13           | 8.8%    | IGKV3-AAP*01 S6980    | LJI.Rh IGKJ1.1 | HQENDFPWT   | 9            | 5.9%    | base                 |
| RM19S  | week 53   | rh1987    | Kappa   | IGHV4-ABB*01 S8200      | IGHD3-9*01      | IGHJ4*01       | ARRSRRYGGDDYGYWYSRSYFDS | 23           | 7.4%    | LJI.Rh IGKV1.56       | LJI.Rh IGKJ4.4 | QQDYSTPFT   | 9            | 5.3%    | N611/FP              |
| RM19T  | week 25   | rh1987    | Kappa   | IGHV4-AGU*01 S2780      | IGHD4-I1        | IGHJ4*01       | ARFNSDYDF               | 9            | 9.5%    | IGKV1-AAL*01          | LJI.Rh IGKJ3.3 | HQHNRYPHT   | 9            | 4.7%    | 289 hole epitope     |
| RM19B  | week 22   | rh1987    | Lambda  | IGHV1-AAU*01 S5608      | IGHD6-11*01     | IGHJ5-2*01     | ARIPWRSIAIPMRGNSFDV     | 20           | 4.4%    | IGLV2-ABJ*01 S9052    | IGLJ1-S1       | SSYAGNSYI   | 10           | 4.3%    | base                 |
| RM19B1 | week 22   | rh1987    | Lambda  | IGHV1-AAU*01 S5608      | IGHD1-I7        | IGHJ5-2*01     | ARIMWRSIAIPMRGNSMDV     | 20           | 6.7%    | IGLV2-ABJ*01 S9052    | IGLJ1-S1       | SSYAGNSYI   | 10           | 4.6%    | base                 |
| RM19C  | week 22   | rh1987    | Lambda  | IGHV4-AGU*01 S6650      | IGHD2-8*01      | IGHJ5-2*01     | ARYCRGSCYGGGSLDV        | 17           | 7.9%    | LJI.Rh IGLV2.21       | IGLJ2-S2       | SSYAGNSLTV  | 10           | 1.6%    | base                 |
| RM19C2 | week 25   | rh1987    | Lambda  | IGHV4-AGU*01 S6650      | IGHD2-30*01     | IGHJ5-2*01     | ARYCSCGLCYGGGSLDV       | 17           | 9.7%    | LJI.Rh IGLV2.21       | IGLJ2-S2       | SSYAGNSLTV  | 10           | 3.1%    | base                 |
| RM19C3 | week 25   | rh1987    | Lambda  | IGHV4-AGU*01 S6650      | IGHD2-8*01      | IGHJ5-2*01     | ARYCSCGALCYGGGSLDV      | 17           | 7.3%    | LJI.Rh IGLV2.21       | IGLJ3-S3       | SSYAGNSLTV  | 10           | 1.5%    | base                 |
| RM19C4 | week 25   | rh1987    | Lambda  | IGHV4-AGU*01 S6650      | IGHD2-2*01      | IGHJ5-2*01     | ARYCRGSCYGGGSLDV        | 17           | 10.2%   | LJI.Rh IGLV2.21       | IGLJ3-S3       | SSYAGNSLTV  | 10           | 2.5%    | base*                |
| RM19E  | week 22   | rh1987    | Lambda  | LJI.Rh IGHV3.122 S8388  | IGHD2-35*01     | LJI.Rh IGHJ5.4 | VRVVSATRGHDFDV          | 15           | 6.3%    | LJI.Rh IGLV8.111      | IGLJ6-S6       | LYMGSGSIV   | 10           | 5.9%    | base                 |
| RM19F  | week 22   | rh1987    | Lambda  | LJI.Rh IGHV4.79.a S9501 | IGHD2-35*01     | IGHJ4*01       | ARFLVVSIAIKAAATVPLEY    | 18           | 3.9%    | IGLV2-ABE*01          | IGLJ3-S3       | SSYAGNSYTVL | 11           | 0.6%    | base                 |
| RM19F1 | week 22   | rh1987    | Lambda  | LJI.Rh IGHV4.79.a       | IGHD2-35*01     | IGHJ4*01       | ARFLVVSIAIKAAATVPLEY    | 18           | 6.2%    | IGLV2-ABE*01          | IGLJ3-S3       | SSYAGNSYTVL | 11           | 0.6%    | base*                |
| RM19G  | week 22   | rh1987    | Lambda  | IGHV1-AAU*02 S1575      | IGHD6-6*01      | IGHJ4*01       | ARDRLAAAGTEHFDY         | 15           | 4.2%    | LJI.Rh IGLV2.33.a     | IGLJ3*01       | CSYLSGSTWV  | 10           | 3.1%    | base                 |
| RM19K  | week 25   | rh1987    | Lambda  | IGHV1-AAU*01 S5608      | IGHD3-26*01     | IGHJ5-2*01     | ARGLDYGARQLGNSLHV       | 18           | 6.1%    | LJI.Rh IGLV2.29       | IGLJ3*01       | YSYAGNSWV   | 10           | 2.8%    | base                 |
| RM19L  | week 25   | rh1987    | Lambda  | LJI.Rh IGHV4.67.a       | IGHD2-35*01     | IGHJ3*01       | ARAPSYGGTSWAFSEGDFD     | 19           | 6.2%    | IGLV1-S42             | IGLJ2-S2       | QMYSGSGAL   | 9            | 3.6%    | base                 |
| RM19M  | week 25   | rh1987    | Lambda  | IGHV4-AGU*01 S2780      | IGHD3-9*01      | LJI.Rh IGHJ5.4 | ARDGYENDYGFYHPVRRHFDV   | 21           | 6.6%    | IGLV2-ABU*02          | IGLJ3*01       | FSYTTNKTWV  | 10           | 10.7%   | base                 |
| RM19O  | week 25   | rh1987    | Lambda  | IGHV4-Rorf3             | IGHD3-26*01     | IGHJ4*01       | AAGGGYGNHFDY            | 13           | 5.9%    | LJI.Rh IGLV2.21 S2946 | IGLJ1*01       | SSYAGNSLTV  | 11           | 2.8%    | base                 |
| RM20E  | week 53   | rh2011    | Kappa   | IGHV5-ABI*01 S2502      | IGHD1-7*01      | IGHJ5-1*01     | VMWVYILTTGNIWVDV        | 16           | 6.4%    | LJI.Rh IGKV2.71       | LJI.Rh IGKJ2.2 | GQITDFPYS   | 9            | 3.6%    | N611/FP              |
| RM20E1 | week 53   | rh2011    | Kappa   | IGHV5-ABI*01 S2502      | IGHD1-7*01      | IGHJ5-1*01     | VMWVYILTTGNIWVDV        | 16           | 5.4%    | LJI.Rh IGKV2.71       | LJI.Rh IGKJ2.2 | GQITDFPYS   | 9            | 3.6%    | N611/FP              |
| RM20E2 | week 53   | rh2011    | Kappa   | IGHV5-ABI*01 S2502      | IGHD1-7*01      | IGHJ5-1*01     | VMWVYILTTGNIWVDV        | 16           | 5.1%    | LJI.Rh IGKV2.71       | LJI.Rh IGKJ2.2 | GQITDFPYS   | 9            | 4.5%    | N611/FP*             |
| RM20E3 | week 53   | rh2011    | Kappa   | IGHV5-ABI*01 S2502      | IGHD1-7*01      | IGHJ5-1*01     | VMWVYILTTGNIWVDV        | 16           | 5.4%    | LJI.Rh IGKV2.71       | LJI.Rh IGKJ2.2 | GQITDFPYS   | 9            | 3.0%    | N611/FP*             |
| RM20F  | week 53   | rh2011    | Kappa   | IGHV3-AFY*10            | IGHD3-14*01     | IGHJ2-11       | ARGGKPIYSGGYPSPYFDL     | 20           | 7.6%    | IGKV6-I1              | LJI.Rh IGKJ3.3 | QQTNSFPCT   | 9            | 5.3%    | gp120/gp41 interface |
| RM20H  | week 53   | rh2011    | Kappa   | LJI.Rh IGHV3.76.a S4190 | IGHD2-13*01     | IGHJ5-1*01     | AKDNYGDIYTGTPYGFDFDV    | 20           | 5.9%    | IGKV3-ADW*01          | LJI.Rh IGKJ4.4 | QQNSNWPLT   | 9            | 4.0%    | gp120/gp41 interface |
| RM20I  | week 53   | rh2011    | Kappa   | IGHV4-ACQ*01 S4946      | IGHD3-3*01      | IGHJ4*01       | ARRVSRDLDFGGAFDC        | 15           | 6.2%    | LJI.Rh IGKV2.71.a     | LJI.Rh IGKJ4.4 | GQTHWPLT    | 9            | 4.8%    | n.d.                 |
| RM20J  | week 53   | rh2011    | Kappa   | IGHV4-AGU*01 S6650      | IGHD1-1*01      | IGHJ4*01       | ARWSTADFDY              | 10           | 8.2%    | IGKV1-AAL*01          | LJI.Rh IGKJ3.3 | QQHNYPLT    | 9            | 5.3%    | 289 hole epitope     |
| RM20A  | week 22   | rh2011    | Lambda  | IGHV3-AFE*01 S3736      | IGHD6-29*01     | IGHJ4*01       | AKGGMSSAWQSSKYFFDQ      | 18           | 5.6%    | LJI.Rh IGLV2.21 S2946 | IGLJ1-S1       | SSYAGSKTFYI | 11           | 4.0%    | base*                |
| RM20A1 | week 22   | rh2011    | Lambda  | IGHV3-AFE*01 S3736      | IGHD6-29*01     | IGHJ4*01       | ARGGMSSAWQSSKYFFDQ      | 18           | 8.5%    | LJI.Rh IGLV2.21 S2946 | IGLJ1*01       | SSYAGNFTFVY | 11           | 5.3%    | base*                |
| RM20A2 | week 25   | rh2011    | Lambda  | IGHV3-AFE*01 S3736      | IGHD6-29*01     | IGHJ4*01       | ARGGMSSAWQSSKYFFDQ      | 18           | 9.1%    | LJI.Rh IGLV2.21 S2946 | IGLJ1*01       | SSYAGNFTFVY | 11           | 4.7%    | base                 |
| RM20A3 | week 53   | rh2011    | Lambda  | IGHV3-AFE*01 S3736      | IGHD6-29*01     | IGHJ4*01       | ATGGMSSALQSSKYFFDQ      | 18           | 9.1%    | LJI.Rh IGLV2.21 S2946 | IGLJ1-S1       | SAYAGRQTFYI | 11           | 4.6%    | base                 |
| RM20B  | week 25   | rh2011    | Lambda  | IGHV4-S11               | IGHD2-35*01     | IGHJ5-1*01     | ARLLVSAIRWEDRFDV        | 16           | 3.0%    | LJI.Rh IGLV2.18       | IGLJ1-S1       | SSLGSGTYI   | 10           | 5.0%    | base                 |
| RM20B1 | week 25   | rh2011    | Lambda  | IGHV4-S11 S0312         | IGHD2-35*01     | IGHJ5-1*01     | ARLLVSAIRWEDRFDV        | 16           | 3.8%    | LJI.Rh IGLV2.18       | IGLJ1*01       | SSFAGGGTYI  | 10           | 4.5%    | base                 |
| RM20C  | week 25   | rh2011    | Lambda  | IGHV3-AEW*01            | IGHD3-9*01      | IGHJ4*01       | TRVAYEHDIYGYKGYFFDQ     | 20           | 4.4%    | IGLV1-ACV*01          | IGLJ6-S6       | QSYDSSLSAHV | 11           | 3.7%    | base                 |
| RM20D  | week 25   | rh2011    | Lambda  | IGHV3-AFY*05            | IGHD4-15*01     | IGHJ4*01       | ARDPSRYGNYPDN           | 13           | 3.6%    | LJI.Rh IGLV4.105      | IGLJ3-S3       | QWTAGIVS    | 9            | 1.8%    | n.d.                 |
| RM20G  | week 53   | rh2011    | Lambda  | IGHV3-AEW*01            | LJI.Rh IGHD5.29 | IGHJ6*01       | TRMRFASQAQEPVYVYGM      | 17           | 6.6%    | IGLV1-S16 S2133       | IGLJ1-S1       | AAWDDSLGGYI | 11           | 3.4%    | base                 |

\*Inferred based on clonal relationship to mAbs with epitopes mapped by ns-EM.

Clonal families are highlighted with individual colors.
