# Supplementary material for: Mapping the immunogenic landscape of near-native HIV-1 envelope trimers in non-human primates
Source: PubMed Central journal article supplement (PMC7485981; doi:10.1371/journal.ppat.1008753), 2020-08-31
Supplement: ppat.1008753.s007.pdf [file ppat.1008753.s007.pdf]

**S3 Table. MAb neutralization, ELISA binding, and EM epitope mapping.**

| mAb    | Timepoint | Neutralization IC <sub>50</sub> (µg/mL) |             | Binding EC <sub>50</sub> |             | Epitope targeted     |
|--------|-----------|-----------------------------------------|-------------|--------------------------|-------------|----------------------|
|        |           | BG505 WT                                | BG505 N611A | SOSIP ELISA              | gp120 ELISA |                      |
| RM19A  | week 22   | 41.8                                    | >50         | ++                       | +++         | 289 hole epitope*    |
| RM19A1 | week 25   | 44.9                                    | >50         | +++                      | +++         | 289 hole epitope     |
| RM19A2 | week 25   | >50                                     | >50         | +++                      | +++         | 289 hole epitope*    |
| RM19A3 | week 25   | >50                                     | <0.41       | ++                       | +           | 289 hole epitope*    |
| RM19B  | week 22   | n.d.                                    | n.d.        | ++                       | -           | base                 |
| RM19B1 | week 22   | >50                                     | >50         | +                        | -           | base                 |
| RM19C  | week 22   | n.d.                                    | n.d.        | +                        | -           | base                 |
| RM19C2 | week 25   | n.d.                                    | n.d.        | ++                       | -           | base                 |
| RM19C3 | week 25   | >50                                     | >50         | ++                       | -           | base                 |
| RM19C4 | week 25   | >50                                     | >50         | ++                       | +           | base*                |
| RM19D  | week 22   | >50                                     | >50         | +++                      | +++         | n.d.                 |
| RM19E  | week 22   | n.d.                                    | n.d.        | +                        | -           | base                 |
| RM19F  | week 22   | n.d.                                    | n.d.        | +                        | -           | base                 |
| RM19F1 | week 22   | n.d.                                    | n.d.        | ++                       | -           | base*                |
| RM19G  | week 22   | n.d.                                    | n.d.        | ++                       | -           | base                 |
| RM19J  | week 25   | >50                                     | >50         | ++                       | -           | 289 hole epitope     |
| RM19K  | week 25   | n.d.                                    | n.d.        | +++                      | ++          | base                 |
| RM19L  | week 25   | n.d.                                    | n.d.        | ++                       | -           | base                 |
| RM19M  | week 25   | 12.9                                    | 5.63        | ++                       | -           | base                 |
| RM19N  | week 25   | >50                                     | >50         | +                        | +           | base                 |
| RM19O  | week 25   | >50                                     | 25.5        | +++                      | +++         | base                 |
| RM19P  | week 25   | 23.5                                    | >50         | +++                      | +++         | 289 hole epitope     |
| RM19R  | week 25   | >50                                     | >50         | ++                       | -           | base                 |
| RM19S  | week 53   | >50                                     | 3.51        | ++                       | -           | N611/FP              |
| RM19T  | week 25   | >50                                     | >50         | ++                       | ++          | 289 hole epitope     |
| RM20A  | week 22   | n.d.                                    | n.d.        | ++                       | -           | base*                |
| RM20A1 | week 22   | n.d.                                    | n.d.        | ++                       | -           | base*                |
| RM20A2 | week 25   | n.d.                                    | n.d.        | ++                       | -           | base                 |
| RM20A3 | week 53   | >50                                     | >50         | ++                       | -           | base                 |
| RM20B  | week 25   | >50                                     | >50         | +                        | -           | base                 |
| RM20B1 | week 25   | n.d.                                    | n.d.        | +                        | -           | base                 |
| RM20C  | week 25   | >50                                     | >50         | +                        | -           | base                 |
| RM20D  | week 25   | >50                                     | >50         | ++                       | +++         | n.d.                 |
| RM20E  | week 53   | >50                                     | <0.41       | +++                      | +           | N611/FP              |
| RM20E1 | week 53   | >50                                     | <0.41       | ++                       | +           | N611/FP              |
| RM20E2 | week 53   | >50                                     | <0.41       | ++                       | +           | N611/FP*             |
| RM20E3 | week 53   | >50                                     | <0.41       | +                        | +           | N611/FP*             |
| RM20F  | week 53   | 1.6                                     | <0.41       | ++                       | +           | gp120/gp41 interface |
| RM20G  | week 53   | n.d.                                    | n.d.        | ++                       | -           | base                 |
| RM20H  | week 53   | 42.9                                    | <0.41       | ++                       | ++          | gp120/gp41 interface |
| RM20I  | week 53   | >50                                     | >50         | ++                       | ++          | n.d.                 |
| RM20J  | week 53   | >50                                     | >50         | +++                      | +++         | 289 hole epitope     |

\*Inferred based on clonal relationship to mAbs with epitopes mapped by ns-EM.

| IC <sub>50</sub> (µg/mL) | EC <sub>50</sub> (µg/mL) |     |
|--------------------------|--------------------------|-----|
| <1                       | <0.1                     | +++ |
| 1-10                     | 0.1-1                    | ++  |
| 10-50                    | 1-10                     | +   |
| >50                      | >10                      | -   |
