# Supplementary material for: Mapping the immunogenic landscape of near-native HIV-1 envelope trimers in non-human primates
Source: PubMed Central journal article supplement (PMC7485981; doi:10.1371/journal.ppat.1008753), 2020-08-31
Supplement: ppat.1008753.s008.pdf [file ppat.1008753.s008.pdf]

**S4 Table. EM Data Collection and Map/Model Refinement Parameters.**

| Complex                                       | BG505.v4.1 + RM20F | BG505.v5.2 + RM20J | BG505.v5.2 + RM20E1 + PGT122 |
|-----------------------------------------------|--------------------|--------------------|------------------------------|
| Microscope                                    | Titan Krios        | Talos Arctica      | Talos Arctica                |
| Voltage, kV                                   | 300                | 200                | 200                          |
| Detector                                      | Gatan K2 Sumit     | Gatan K2 Sumit     | Gatan K2 Sumit               |
| Recording Mode                                | Counting           | Counting           | Counting                     |
| Magnification                                 | 29,000             | 36,000             | 36,000                       |
| Moive micrograph pixel size, Å                | 1.03               | 1.15               | 1.15                         |
| Dose rate, e <sup>-</sup> /[(camera pixel)*s] | 8.833              | 6.004              | 5.656                        |
| No. of frames per moive micrograph            | 24                 | 44                 | 48                           |
| Frame exposure time, ms                       | 250                | 250                | 250                          |
| Movie micrograph exposure time, s             | 6                  | 11                 | 12                           |
| Total dose, e <sup>-</sup> /Å <sup>2</sup>    | 50.0               | 49.9               | 51.3                         |
| Defocus range, µm                             | 1.3 to 2.8         | 1.0 to 3.5         | 1.0 to 2.5                   |
| No. of movie micrographs                      | 1055               | 553                | 579                          |
| No. of molecular projection images in map     | 91212              | 26327              | 17010                        |
| Symmetry                                      | C3                 | C3                 | C1                           |
| Map resolution (FSC 0.143)                    | 4.25               | 3.88               | 4.42                         |
| Map sharpening B-factor, Å <sup>2</sup>       | -174.7             | -112.6             | -81.2                        |
| No. of atoms in deposited model               | 19962              | 19785              | 21768                        |
| MolProbit score                               | 1.16               | 1.38               | 0.97                         |
| Cβ Outliers (%)                               | 0.00               | 0.00               | 0.00                         |
| Rotamer Outliers (%)                          | 0.15               | 0.72               | 0.13                         |
| Rama Outliers (%)                             | 0.65               | 1.29               | 0.20                         |
| Clashscore                                    | 1.75               | 2.12               | 0.97                         |
| EMRinger score                                | 2.02               | 2.71               | 1.82                         |
| Privateer                                     | pass               | pass               | pass                         |
| EMDB                                          | EMD-21246          | EMD-21257          | EMD-21232                    |
| PDB ID                                        | 6VN0               | 6VO1               | 6VLR                         |
