# Supplementary material for: Mapping the immunogenic landscape of near-native HIV-1 envelope trimers in non-human primates
Source: PubMed Central journal article supplement (PMC7485981; doi:10.1371/journal.ppat.1008753), 2020-08-31
Supplement: ppat.1008753.s009.pdf [file ppat.1008753.s009.pdf]

**S5 Table. X-ray data collection and refinement statistics.**

| Data collection                                                      | RM20F (PDB:6VSR)                               | RM20J (PDB:6VOS)                   | RM20E1 (PDB:6VOR)                              |
|----------------------------------------------------------------------|------------------------------------------------|------------------------------------|------------------------------------------------|
| Beamline                                                             | SSRL 12-2                                      | APS 23ID-B                         | SSRL 12-2                                      |
| Wavelength (Å)                                                       | 0.97946                                        | 1.03322                            | 0.97946                                        |
| Space group                                                          | P 2 <sub>1</sub> 2 <sub>1</sub> 2 <sub>1</sub> | P 4 <sub>3</sub> 2 <sub>1</sub> 2  | P 1                                            |
| Unit cell parameters                                                 | a=61.5, b=75.6, c=115.1, α=β=γ=90              | a=b=112.3, c=141.0, α=β=γ=90       | a=57.4, b=57.7, c=92.7, α=98.7, β=94.1, γ=97.8 |
| Resolution (Å)                                                       | 36.7-2.20 (2.24-2.20) <sup>a</sup>             | 50.0-2.30 (2.34-2.30) <sup>a</sup> | 50.0-1.85 (1.90-1.85) <sup>a</sup>             |
| Unique Reflections                                                   | 28,053 (1,364) <sup>a</sup>                    | 40,057 (1,946) <sup>a</sup>        | 142,088 (2,413) <sup>a</sup>                   |
| Redundancy                                                           | 4.0 (4.0) <sup>a</sup>                         | 17.5 (11.2) <sup>a</sup>           | 2.7 (1.3) <sup>a</sup>                         |
| Completeness (%)                                                     | 98.6 (99.4) <sup>a</sup>                       | 100 (99.6) <sup>a</sup>            | 85.4 (32.5) <sup>a</sup>                       |
| <I/σ <sub>I</sub> >                                                  | 7.7 (2.0) <sup>a</sup>                         | 28.0 (1.0) <sup>a</sup>            | 18.8 (1.2) <sup>a</sup>                        |
| R <sub>sym</sub> <sup>b</sup> (%)                                    | 19.7 (83.0) <sup>a</sup>                       | 12.9 (>100) <sup>a</sup>           | 10.9 (69.1) <sup>a</sup>                       |
| R <sub>pim</sub> <sup>b</sup> (%)                                    | 11.0 (46.4) <sup>a</sup>                       | 3.0 (50.3) <sup>a</sup>            | 4.9 (51.7) <sup>a</sup>                        |
| CC <sub>1/2</sub> <sup>c</sup> (%)                                   | 83.9 (54.0) <sup>a</sup>                       | 89.7 (44.1) <sup>a</sup>           | 91.6 (56.0) <sup>a</sup>                       |
| <b>Refinement statistics</b>                                         |                                                |                                    |                                                |
| Reflections (work)                                                   | 26,622                                         | 39,953                             | 75,965                                         |
| Reflections (test)                                                   | 1,374                                          | 1,999                              | 3,285                                          |
| R <sub>cryst</sub> <sup>d</sup> / R <sub>free</sub> <sup>e</sup> (%) | 19.7/24.1                                      | 18.1/21.1                          | 22.4/25.2                                      |
| No. of atoms                                                         |                                                |                                    |                                                |
| Protein                                                              | 3,328                                          | 3,604                              | 6,731                                          |
| Water                                                                | 288                                            | 224                                | 320                                            |
| Average B-value (Å <sup>2</sup> )                                    |                                                |                                    |                                                |
| Protein                                                              | 25                                             | 62                                 | 39                                             |
| Water                                                                | 34                                             | 68                                 | 40                                             |
| Wilson B-value (Å <sup>2</sup> )                                     | 21                                             | 57                                 | 30                                             |
| <b>RMSD from ideal geometry</b>                                      |                                                |                                    |                                                |
| Bond length (Å)                                                      | 0.002                                          | 0.007                              | 0.008                                          |
| Bond angle (°)                                                       | 0.55                                           | 0.95                               | 0.99                                           |
| <b>Ramachandran statistics (%)</b>                                   |                                                |                                    |                                                |
| Favored                                                              | 97.5                                           | 96.1                               | 96.3                                           |
| Outliers                                                             | 0.0                                            | 0.2                                | 0.1                                            |

<sup>a</sup> Numbers in parentheses refer to the highest resolution shell.

<sup>b</sup>  $R_{sym} = \sum_{hkl} \sum_i |I_{hkl,i} - \langle I_{hkl} \rangle| / \sum_{hkl} \sum_i I_{hkl,i}$  and  $R_{pim} = \sum_{hkl} (1/(n-1))^{1/2} \sum_i |I_{hkl,i} - \langle I_{hkl} \rangle| / \sum_{hkl} \sum_i I_{hkl,i}$ , where  $I_{hkl,i}$  is the scaled intensity of the  $i^{\text{th}}$  measurement of reflection h, k, l,  $\langle I_{hkl} \rangle$  is the average intensity for that reflection, and  $n$  is the redundancy.

<sup>c</sup> CC<sub>1/2</sub> = Pearson correlation coefficient between two random half datasets.

<sup>d</sup>  $R_{cryst} = \sum_{hkl} |F_o - F_c| / \sum_{hkl} |F_o| \times 100$ , where  $F_o$  and  $F_c$  are the observed and calculated structure factors, respectively.

<sup>e</sup>  $R_{free}$  was calculated as for  $R_{cryst}$ , but on a test set comprising 5% of the data excluded from refinement.
