# Supplementary material for: Mapping the immunogenic landscape of near-native HIV-1 envelope trimers in non-human primates
Source: PubMed Central journal article supplement (PMC7485981; doi:10.1371/journal.ppat.1008753), 2020-08-31
Supplement: ppat.1008753.s010.pdf [file ppat.1008753.s010.pdf]

**S6 Table. BLI Binding Kinetics.**

| <b>mAb</b> | <b>Timepoint</b> | <b>Animal ID</b> | <b>KD (M)</b> | <b>kon(1/Ms)</b> | <b>kdis (1/s)</b> |
|------------|------------------|------------------|---------------|------------------|-------------------|
| RM19A      | week 22          | rh1987           | n.d.          | n.d.             | n.d.              |
| RM19A1     | week 25          | rh1987           | 3.94E-10      | 1.41E+04         | 5.57E-06          |
| RM19A2     | week 25          | rh1987           | n.d.          | n.d.             | n.d.              |
| RM19A3     | week 25          | rh1987           | n.d.          | n.d.             | n.d.              |
| RM19B      | week 22          | rh1987           | 9.87E-10      | 3.12E+05         | 3.08E-04          |
| RM19B1     | week 22          | rh1987           | 7.00E-10      | 4.01E+05         | 2.80E-04          |
| RM19C      | week 22          | rh1987           | 1.50E-09      | 2.66E+05         | 4.00E-04          |
| RM19C2     | week 25          | rh1987           | <1.0E-12      | 1.12E+05         | <1.0E-07          |
| RM19C3     | week 25          | rh1987           | 6.80E-11      | 9.95E+04         | 6.76E-06          |
| RM19C4     | week 25          | rh1987           | n.d.          | n.d.             | n.d.              |
| RM19D      | week 22          | rh1987           | 1.57E-07      | 1.68E+03         | 2.63E-04          |
| RM19E      | week 22          | rh1987           | 1.28E-10      | 2.80E+05         | 3.60E-05          |
| RM19F      | week 22          | rh1987           | 4.98E-09      | 6.30E+05         | 3.14E-03          |
| RM19F1     | week 22          | rh1987           | 2.88E-08      | 7.98E+04         | 2.30E-03          |
| RM19G      | week 22          | rh1987           | 3.95E-07      | 2.67E+03         | 1.05E-03          |
| RM19J      | week 25          | rh1987           | 1.95E-08      | 3.98E+03         | 7.77E-05          |
| RM19K      | week 25          | rh1987           | 8.55E-08      | 3.72E+03         | 3.18E-04          |
| RM19L      | week 25          | rh1987           | 6.03E-10      | 1.02E+05         | 6.15E-05          |
| RM19M      | week 25          | rh1987           | 1.03E-08      | 2.27E+04         | 2.34E-04          |
| RM19N      | week 25          | rh1987           | 1.46E-08      | 3.66E+05         | 5.33E-03          |
| RM19O      | week 25          | rh1987           | 1.87E-08      | 3.82E+04         | 7.14E-04          |
| RM19P      | week 25          | rh1987           | 2.09E-09      | 8.26E+03         | 1.73E-05          |
| RM19R      | week 25          | rh1987           | 5.52E-10      | 1.12E+05         | 6.18E-05          |
| RM19S      | week 53          | rh1987           | 1.47E-07      | 7.16E+03         | 1.05E-03          |
| RM19T      | week 25          | rh1987           | 8.45E-10      | 2.28E+04         | 1.93E-05          |
| RM20A      | week 22          | rh2011           | n.d.          | n.d.             | n.d.              |
| RM20A1     | week 22          | rh2011           | n.d.          | n.d.             | n.d.              |
| RM20A2     | week 25          | rh2011           | <1.0E-12      | 8.95E+05         | <1.0E-07          |
| RM20A3     | week 53          | rh2011           | <1.0E-12      | 7.82E+05         | <1.0E-07          |
| RM20B      | week 25          | rh2011           | 3.92E-08      | 1.67E+04         | 6.56E-04          |
| RM20B1     | week 25          | rh2011           | 1.85E-09      | 3.48E+05         | 6.44E-04          |
| RM20C      | week 25          | rh2011           | 2.55E-09      | 2.67E+04         | 6.79E-05          |
| RM20D      | week 25          | rh2011           | n.d.          | n.d.             | n.d.              |
| RM20E      | week 53          | rh2011           | n.d.          | n.d.             | n.d.              |
| RM20E1     | week 53          | rh2011           | 5.85E-10      | 5.75E+04         | 3.36E-05          |
| RM20E2     | week 53          | rh2011           | n.d.          | n.d.             | n.d.              |
| RM20E3     | week 53          | rh2011           | n.d.          | n.d.             | n.d.              |
| RM20F      | week 53          | rh2011           | 1.60E-08      | 8.11E+03         | 1.30E-04          |
| RM20G      | week 53          | rh2011           | 8.01E-11      | 5.71E+05         | 4.58E-05          |
| RM20H      | week 53          | rh2011           | 1.61E-08      | 1.37E+04         | 2.21E-04          |
| RM20I      | week 53          | rh2011           | 1.27E-07      | 2.53E+03         | 3.21E-04          |
| RM20J      | week 53          | rh2011           | <1.0E-12      | 4.47E+04         | <1.0E-07          |
