# Supplementary material for: Mapping the immunogenic landscape of near-native HIV-1 envelope trimers in non-human primates
Source: PubMed Central journal article supplement (PMC7485981; doi:10.1371/journal.ppat.1008753), 2020-08-31
Supplement: ppat.1008753.s011.pdf [file ppat.1008753.s011.pdf]

**S7 Table. Heterologous neutralization RM20F.**

| Virus name        | Tier*   | Subtype | Accession | RM20F | ACS202* | VRC34* |
|-------------------|---------|---------|-----------|-------|---------|--------|
| 001428_2_42       | 2       | C       | EF117266  | >100  | >10     | 0.075  |
| 1012_11_TC21_3257 | 1B or 2 | B       | EU289184  | >100  | >10     | n.d.   |
| AC10_29           | 2       | B       | AY835446  | >100  | >10     | >10    |
| BJOX010000_06_2   | 2       | 01_AE   | HM215373  | >100  | 0.506   | >10    |
| BJOX015000_11_5   | 2       | 01_AE   | HM215377  | >100  | 0.023   | n.d.   |
| BJOX025000_01_1   | 2       | 01_AE   | HM215386  | >100  | 0.003   | >10    |
| BJOX028000_10_3   | 2       | 01_AE   | HM215389  | >100  | 0.005   | >10    |
| C2101_C1          | 2       | 01_AE   | JN944661  | >100  | n.d.    | 0.218  |
| C3347_C11         | 2       | 01_AE   | JX512902  | >100  | >10     | >10    |
| C4118_9           | 2       | 01_AE   | JQ352782  | >100  | 0.411   | >10    |
| CAP210_E8         | 2       | C       | DQ435683  | >100  | 0.297   | 0.183  |
| CAP45_G3          | 2       | C       | DQ435682  | >100  | n.d.    | 0.056  |
| CNE20             | 2       | 07_BC   | HM215406  | >100  | >10     | >10    |
| CNE5              | 2       | 01_AE   | HM215415  | >100  | >10     | >10    |
| DU156_12          | 2       | C       | DQ411852  | >100  | n.d.    | >10    |
| DU172_17          | 2       | C       | DQ411853  | >100  | n.d.    | 0.078  |
| PVO_4             | 2 or 3  | B       | AY835444  | >100  | 0.043   | >10    |
| Q23_17            | 1B      | A1      | AF004885  | >100  | >10     | 0.099  |
| Q842_D12          | 2       | A1      | AF407160  | >100  | n.d.    | 0.138  |
| REJO4541_67       | 2       | B       | AY835449  | >100  | >10     | >10    |
| RHPA4259_7        | 2       | B       | AY835447  | >100  | 0.012   | 1.559  |
| SC422_8           | 2       | B       | AY835441  | >100  | >10     | >10    |
| THRO4156          | 2       | B       | AY835448  | >100  | n.d.    | >10    |
| TRJO4551_58       | 3       | B       | AY835450  | >100  | 0.029   | 7.334  |
| TRO_11            | 2       | B       | AY835445  | >100  | >10     | >10    |
| ZM109_4           | 1B or 2 | C       | AY424138  | >100  | n.d.    | 1.432  |
| ZM135_10A         | 2       | C       | AY424079  | >100  | n.d.    | >10    |
| ZM197_7           | 1B or 2 | C       | DQ388515  | >100  | n.d.    | >10    |

\*Data obtained from Los Alamos National Lab (LANL) CATNAP application (Yoon et al., 2015).
